# Supplementary material for: Behaviour change strategies for reducing blood pressure-related disease burden: findings from a global implementation research programme
Source: Springer Nature journal article supplement (doi:10.1186/s13012-015-0331-0), 2015-11-09
Supplement: MOESM8 [file 9773192]

## Treating Hypertension in Rural South Africa: Strengthening Community-Based Outreach Services for Integrated Chronic Care (ZAF 5)

Target behaviour change: Changing clinic systems and behaviour of health professionals in the clinic

Behaviour change target groups: Health professionals, lay health workers, health policy makers, and members of the lay community

Country/countries: South Africa

### Barriers/enablers to behaviour change

|                                     | Community | Non-physician healthworkers | Doctors | Health administrators | Notes |
|-------------------------------------|-----------|-----------------------------|---------|-----------------------|-------|
| Capability – physical/psychological | Medium    | High                        | Low     | High                  | 1     |
| Motivation – reflective/automatic   | Medium    | Low                         | Low     | High                  | 2     |
| Opportunity – physical/social       | Medium    | High                        | Low     | High                  | 3     |

### Notes

1 - Doctors are not very often in the clinics and do not affect how they are run. Observations and interviews in the clinics have noted a wide range in quality of care and motivation of staff. One community focus group reported lack of respect from staff, long waits and drug outages as disincentives. Talks at provincial level indicate very high motivation and support for change.

2 - Involvement of both community members and lay health workers is largely at implementation level. Lay health workers include those with basic secondary certificate and experience in community health work. Doctors are not very often in the clinics. Most of the planning is done at clinic manager's level and beyond.

3 - For health administrators, there is political will in addressing the growing levels of chronic diseases. The sub-district is one of the beneficiaries of the newly introduced integrated chronic care model. Local non-governmental organisations are already supporting clinics in chronic care, and together with clinic committees are willing to support the intervention

### Intervention classification

| Intervention                | GACD project | Notes |
|-----------------------------|--------------|-------|
| Restrictions                | No           |       |
| Education                   | Yes          | 1     |
| Persuasion                  | Partially    |       |
| Incentivisation             | No           |       |
| Coercion                    | No           |       |
| Training                    | Yes          | 2     |
| Enablement                  | Yes          | 3     |
| Modelling                   | No           |       |
| Environmental restructuring | Yes          | 4     |
| <b>Policy factors</b>       |              |       |
| Guidelines                  | No           | 5     |

|                                |     |   |
|--------------------------------|-----|---|
| Environment/social planning    | No  |   |
| Communication/marketing        | No  |   |
| Legislation                    | No  |   |
| Service provision              | Yes | 6 |
| Regulation                     | No  |   |
| Fiscal measures (eg. taxation) | No  |   |

### Notes

1 - Training for nurses and lay health workers, and health education for patients.

2 - Nurses in-service training and training of lay health workers.

3 - Extra support to enable nurses to function better i.e in service trainings, mobilizing clinic equipment and engaging an implementation manager to support the lay health workers. Also we have provided working BP cuffs since there were none that were useable, and have arranged repair of BP machines.

4 - Altering the patient pathway in the clinic and introducing some activities that were initially not in the clinics i.e. reminding patients of their appointments.

5 - Already in existence but not followed.

6 - Provision of extra resources in clinics.
