# Supplementary material for: Behaviour change strategies for reducing blood pressure-related disease burden: findings from a global implementation research programme
Source: Springer Nature journal article supplement (doi:10.1186/s13012-015-0331-0), 2015-11-09
Supplement: MOESM11 [file 9773192]

## **Randomised Controlled Trial of Early Use of a Simplified Treatment Regimen Incorporating a Half-Dose, Three-in-One Blood Pressure Lowering Pill vs. Usual Care for Improving Hypertension Control in India (IND 8)**

Target behaviour change: To improve prescriber and patient uptake of BP-lowering medications

Behaviour change target groups: Patients in urban India, doctors

Country/countries: India

### **Barriers/enablers to behaviour change**

|                                     | Community | Non-physician healthworkers | Doctors | Notes |
|-------------------------------------|-----------|-----------------------------|---------|-------|
| Capability – physical/psychological | Medium    | N/A                         | High    | 1     |
| Motivation – reflective/automatic   | Medium    | N/A                         | High    | 2     |
| Opportunity – physical/social       | High      | N/A                         | High    |       |

### **Notes**

1 - Reasonable education, patients attending hospitals clinics with good access to drugs and care. Reasonable income level.

2 - As above for patients. Doctors should be highly motivated to achieve outcomes.

### **Intervention classification**

| <b>Intervention</b>            | GACD project | UMPIRE    | Notes |
|--------------------------------|--------------|-----------|-------|
| Restrictions                   | No           | No        |       |
| Education                      | No           | No        |       |
| Persuasion                     | No           | No        |       |
| Incentivisation                | No           | No        |       |
| Coercion                       | No           | No        |       |
| Training                       | No           | No        |       |
| Enablement                     | Yes          | Yes       | 1     |
| Modelling                      | No           | No        |       |
| Environmental restructuring    | Yes          | No        | 2     |
| <b>Policy factors</b>          |              |           |       |
| Guidelines                     | Partially    | Partially | 3     |
| Environment/social planning    | No           | No        |       |
| Communication/marketing        | No           | No        |       |
| Legislation                    | No           | No        |       |
| Service provision              | No           | No        |       |
| Regulation                     | No           | No        |       |
| Fiscal measures (eg. taxation) | No           | No        |       |

## **Notes**

1 - Making available a simpler, more effective treatment option for BP lowering - three BP-lowering drugs in one. Promoting a simpler up-titration strategy which will minimise requirement for doctor visits for repeated titration/addition of other drugs.

2 - Promoting the availability of a newer drug which has the capability of improving BP control through more rapid reaching of target, convenience of one drug which will promote patient achieving target BP.

3 - We would like to inform guidelines on BP management by contributing to the academic literature around the use of combination medication as first line treatment.
