# Supplementary material for: Behaviour change strategies for reducing blood pressure-related disease burden: findings from a global implementation research programme
Source: Springer Nature journal article supplement (doi:10.1186/s13012-015-0331-0), 2015-11-09
Supplement: MOESM12 [file 9773192]

## Developing the Evidence Base for a National Salt Reduction Programme for India (IND 9)

Target behaviour change: Reduction in dietary intake, reduction of salt levels in foods and meals

Behaviour change target groups: Consumers, food industry and service providers

Country/countries: India

### Barriers/enablers to behaviour change

|                                     | Community | Non-physician healthworkers | Doctors | Food industry and policymakers | Notes |
|-------------------------------------|-----------|-----------------------------|---------|--------------------------------|-------|
| Capability – physical/psychological | Medium    | Medium                      | High    | High                           | 1     |
| Motivation – reflective/automatic   | Low       | Low                         | Low     | Low                            | 2     |
| Opportunity – physical/social       | Low       | Low                         | Low     | Low                            | 3     |

### Notes

1 - Food Industry and policymakers will have high probability of supporting salt reduction through indirect means. Doctors and community members may have some influence over behaviour change. No empirical work.

2 - Community may have low level motivation due to habit/cultural influences and lack of knowledge about the adverse health impact. No empirical evidence.

3 - Affected by habit and culture and also limited knowledge about the health impact. Controlled by food manufacturers/industry whom without policy push would have little motivation. No empirical evidence.

### Intervention classification

| Intervention                | GACD project | China salt substitute | Mongolia workplace intervention | Notes |
|-----------------------------|--------------|-----------------------|---------------------------------|-------|
| Restrictions                | No           | No                    | No                              |       |
| Education                   | Yes          | Yes                   | Partially                       | 1     |
| Persuasion                  | No           | No                    | No                              |       |
| Incentivisation             | No           | No                    | No                              | 2     |
| Coercion                    | Not sure     | No                    | No                              | 3     |
| Training                    | Partially    | No                    | No                              | 4     |
| Enablement                  | No           | No                    | No                              | 5     |
| Modelling                   | No           | No                    | No                              |       |
| Environmental restructuring | Not sure     | Yes                   | Yes                             | 6     |
| <b>Policy factors</b>       |              |                       |                                 |       |
| Guidelines                  | Yes          | No                    | No                              | 7     |
| Environment/social planning | No           | Not sure              | Not sure                        |       |
| Communication/marketing     | Yes          | Yes                   | Yes                             | 8     |
| Legislation                 | Not sure     | No                    | No                              | 9     |

|                                |          |     |     |    |
|--------------------------------|----------|-----|-----|----|
| Service provision              | No       | Yes | Yes |    |
| Regulation                     | Not sure | No  | No  | 10 |
| Fiscal measures (eg. taxation) | Not sure | No  | No  | 11 |

### Notes

- 1 - Community campaign to build awareness. Provide guidelines on reducing salt intake in food eg WHO and MoH Mongolia work place intervention on salt reduction.
- 2 - Voluntary or mandated targets for salt levels in foods and/or front of pack labelling.
- 3 - Potentially taxes on high salt foods.
- 4 - Training for food industry and food service providers.
- 5 - Environmental changing – FoodSwitch.
- 6 - FoodSwitch. Regulations on salt levels.
- 7 - National guidelines on reducing salt in processed foods/healthy eating guidelines for consumers.
- 8 - Social marketing campaigns: may cover persuasion/incentivisation.
- 9 - Potentially targets or labelling may require legislation.
- 10 - Potentially food industry regulations; voluntary or mandated targets for salt levels in foods.
- 11 - Potential taxes on high salt foods.
