# Supplementary material for: Behaviour change strategies for reducing blood pressure-related disease burden: findings from a global implementation research programme
Source: Springer Nature journal article supplement (doi:10.1186/s13012-015-0331-0), 2015-11-09
Supplement: MOESM13 [file 9773192]

## Cost Effectiveness of Salt Reduction Interventions in Pacific Islands (FJI/WSM 10)

Target behaviour change: Reduce salt use

Behaviour change target groups: Consumers/food industry and service providers

Country/countries: Fiji and Samoa

### Barriers/enablers to behaviour change

|                                     | Community | Non-physician healthworkers | Doctors | Food industry and policymakers | Notes |
|-------------------------------------|-----------|-----------------------------|---------|--------------------------------|-------|
| Capability – physical/psychological | Medium    | High                        | High    | High                           | 1     |
| Motivation – reflective/automatic   | Low       | Low                         | Medium  | Medium                         | 2     |
| Opportunity – physical/social       | Low       | Medium                      | Medium  | High                           | 3     |

### Notes

1 - No empirical work to inform rating.

2 - Behaviour is affected by habit and culture and controlled by industry. No empirical work to inform rating.

3 - No empirical work to inform rating.

### Intervention classification

| Intervention                | GACD project | Mongolia (Ulaanbaatar) workplace intervention on salt reduction | China salt substitute | Notes |
|-----------------------------|--------------|-----------------------------------------------------------------|-----------------------|-------|
| Restrictions                | No           |                                                                 |                       |       |
| Education                   | Yes          | Yes                                                             | Yes                   | 1     |
| Persuasion                  | No           |                                                                 |                       |       |
| Incentivisation             | No           |                                                                 |                       |       |
| Coercion                    | No           |                                                                 |                       |       |
| Training                    | Yes          | Yes                                                             | Yes                   | 2     |
| Enablement                  | No           |                                                                 |                       |       |
| Modelling                   | No           |                                                                 |                       |       |
| Environmental restructuring | Yes          | Yes                                                             | Yes                   | 3     |
| <b>Policy factors</b>       |              |                                                                 |                       |       |
| Guidelines                  | Yes          | Yes                                                             | No                    | 4     |
| Environment/social planning | No           | No                                                              | No                    |       |
| Communication/marketing     | Yes          | Yes                                                             | Yes                   | 5     |
| Legislation                 | No           | No                                                              | No                    |       |
| Service provision           | No           | Yes                                                             | Yes                   | 6     |
| Regulation                  | Yes          | No                                                              | No                    | 7     |

|                                |    |    |    |   |
|--------------------------------|----|----|----|---|
| Fiscal measures (eg. taxation) | No | No | No | 8 |
|--------------------------------|----|----|----|---|

**Notes**

- 1 - Consumer campaigns/social marketing strategies
- 2 - Training for industry and food service providers
- 3 - Changing salt levels in foods and meals
- 4 - Policy/strategy to reduce population salt intake to 5g/day
- 5 - Social marketing campaign
- 6 - Workplace intervention in Mongolia/Salt substitute in China
- 7 - Voluntary or mandatory targets for salt levels in food
- 8 - Potential for taxes on high salt foods but not tried by these countries
