# Supplementary material for: Behaviour change strategies for reducing blood pressure-related disease burden: findings from a global implementation research programme
Source: Springer Nature journal article supplement (doi:10.1186/s13012-015-0331-0), 2015-11-09
Supplement: MOESM15 [file 9773192]

## Task Shifting and Blood Pressure Control in Ghana: A Cluster-Randomized Trial (GHA 12)

Target behaviour change: Improved blood pressure control

Behaviour change target groups: Patients with uncontrolled hypertension who receive care in community-based primary care practices

Country/countries: Ghana (Ashanti Region)

### Barriers/enablers to behaviour change

No empirical study done yet. Data based on knowledge obtained from nurses during training of implementation of the intervention.

|                                     | Community | Non-physician healthworkers | Doctors | Notes |
|-------------------------------------|-----------|-----------------------------|---------|-------|
| Capability – physical/psychological | Low       | Medium                      | High    |       |
| Motivation – reflective/automatic   | Low       | Medium                      | Medium  |       |
| Opportunity – physical/social       | Low       | Medium                      | Medium  |       |

### Intervention classification

| Intervention                   | GACD project | Notes |
|--------------------------------|--------------|-------|
| Restrictions                   | No           |       |
| Education                      | Yes          | 1     |
| Persuasion                     | Yes          | 2     |
| Incentivisation                | Yes          |       |
| Coercion                       | No           |       |
| Training                       | Yes          | 3     |
| Enablement                     | Yes          | 4     |
| Modelling                      | Yes          |       |
| Environmental restructuring    | Yes          | 5     |
| <b>Policy factors</b>          |              |       |
| Guidelines                     | Yes          |       |
| Environment/social planning    | Yes          |       |
| Communication/marketing        | Yes          |       |
| Legislation                    | No           |       |
| Service provision              | Yes          | 6     |
| Regulation                     | Yes          |       |
| Fiscal measures (eg. taxation) | No           |       |

### Notes

- 1 - Patient education and training of nurses in patient counselling using motivational interviewing.
- 2 - Patients were counselled by trained nurses using motivational interviewing.
- 3 - Nurses were trained in lifestyle behaviour counselling - medication adherence, dietary change, physical activity, and salt intake.

4 - Patients were provided health insurance cards for clinic visits and free medications.

5 - Health insurance cards and role modelling with nurses for training of other nurses.

6 - Provision of health insurance cards and free medications.
