# Supplementary material for: Behaviour change strategies for reducing blood pressure-related disease burden: findings from a global implementation research programme
Source: Springer Nature journal article supplement (doi:10.1186/s13012-015-0331-0), 2015-11-09
Supplement: MOESM16 [file 9773192]

## Optimizing Linkage and Retention to Hypertension Care in Rural Kenya (KEN 13)

Target behaviour change: Linking and retaining hypertensive individuals to hypertensive care

Behaviour change target groups: Adult individuals with elevated BP (SBP > 140 or DBP >90)

Country/countries: Kenya

### Barriers/enablers to behaviour change

|                                     | Community | Non-physician healthworkers | Doctors | Notes |
|-------------------------------------|-----------|-----------------------------|---------|-------|
| Capability – physical/psychological | Low       | Medium                      | Medium  | 1     |
| Motivation – reflective/automatic   | Medium    | Medium                      | High    | 2     |
| Opportunity – physical/social       | Medium    | Medium                      | Low     | 3     |

### Notes

1 - Qualitative focus group discussions (FGDs) and mabaraza (traditional Kenyan community assembly): ignorance regarding risks; asymptomatic nature; health education.

2 - Qualitative FGDs and mabaraza: fear of health facility tests and drugs; fear of providers; fear of being burdensome to the family.

3 - Qualitative FGDs and mabaraza: poor service by providers; popularity of alternative medicine; conflicting and competing roles; poverty/lack of money (fare, medical fee, drug fees); unavailability of drugs at health facilities; alcoholism; religious beliefs.

### Intervention classification

| Intervention                   | GACD project | Notes |
|--------------------------------|--------------|-------|
| Restrictions                   | No           |       |
| Education                      | Yes          | 1     |
| Persuasion                     | Yes          | 2     |
| Incentivisation                | Partially    | 3     |
| Coercion                       | No           |       |
| Training                       | Yes          | 4     |
| Enablement                     | Yes          | 5     |
| Modelling                      | No           |       |
| Environmental restructuring    | Yes          | 6     |
| <b>Policy factors</b>          |              |       |
| Guidelines                     | Yes          | 7     |
| Environment/social planning    | No           |       |
| Communication/marketing        | Yes          | 8     |
| Legislation                    | No           |       |
| Service provision              | Yes          | 9     |
| Regulation                     | No           |       |
| Fiscal measures (eg. taxation) | No           |       |

## Notes

- 1 - Provision of educational materials relating to healthy living and behavioral change; training of community health workers (CHWs) and community health extension workers (CHEWs).
- 2 - Tailored behavioural communication strategy: counselling participants on the importance of certain choices and the benefits or disadvantages associated with it; encouraging them to make positive choices and reinforcing with examples.
- 3 - Considering positive reinforcement for CHWs who successfully link patients to care.
- 4 - Training CHWs and CHEWs by providing them with the necessary skills in motivational interviewing, smartphone technology, and clinical hypertension assessment.
- 5 - Providing BP machines to CHWs so as to facilitate the evaluation of BP in the community.
- 6 - Smartphone tool linked to an electronic health record (in one arm of the trial).
- 7 - Treatment protocols for hypertension in AMPATH clinics and dispensaries; referral protocols for CHWs.
- 8 - Mabaraza, discussion with chiefs.
- 9 - CHWs augmented with a tailored behavioral communication strategy, with or without a smartphone-based tool.
