# Supplementary material for: Behaviour change strategies for reducing blood pressure-related disease burden: findings from a global implementation research programme
Source: Springer Nature journal article supplement (doi:10.1186/s13012-015-0331-0), 2015-11-09
Supplement: MOESM18 [file 9773192]

## Tailored Hospital-based Risk Reduction to Impede Vascular Events after Stroke (THRIVES) (NGA 15)

Target behaviour change: Empowering patients who have had a stroke to improve their adherence to medicines and recommended health care visits

Behaviour change target groups: Patients who have had a past history of stroke and their carers

Country/countries: Nigeria

### Barriers/enablers to behaviour change

|                                     | Community | Non-physician healthworkers | Doctors | Notes |
|-------------------------------------|-----------|-----------------------------|---------|-------|
| Capability – physical/psychological | Medium    | Medium                      | High    | 1     |
| Motivation – reflective/automatic   | High      | High                        | High    | 2     |
| Opportunity – physical/social       | Low       | Low                         | Low     | 3     |

### Notes

1 - Basic literacy levels; high acceptance of the importance of medicines in care (not evenly distributed across all sites).

2 - Training opportunities are high; will to be alive post-stroke is strong; strong social capital with carers expected to play an active role in post-stroke care.

3 - Too many patients to see; lack of technology; patients cannot afford the investigations and medicines; lack of availability of medicines; long distances to travel to get health care; alternative care providers (traditional healers).

### Intervention classification

| Intervention                | GACD project | H3Africa – SIREN project | GACD Notes | SIREN Notes |
|-----------------------------|--------------|--------------------------|------------|-------------|
| Restrictions                | No           | No                       |            |             |
| Education                   | Yes          | Yes                      | 1          | 2           |
| Persuasion                  | Yes          | Yes                      | 3          | 4           |
| Incentivisation             | No           | No                       |            |             |
| Coercion                    | No           | No                       |            |             |
| Training                    | No           | Yes                      |            | 5           |
| Enablement                  | No           | No                       |            |             |
| Modelling                   | No           | No                       |            |             |
| Environmental restructuring | No           | No                       |            |             |
| <b>Policy factors</b>       |              |                          |            |             |
| Guidelines                  | Yes          | Yes                      | 6          | 7           |
| Environment/social planning | No           | Yes                      |            | 8           |
| Communication/marketing     | Yes          | Yes                      | 9          |             |
| Legislation                 | No           | No                       |            |             |
| Service provision           | No           | No                       |            |             |
| Regulation                  | No           | No                       |            |             |

|                                |    |    |  |  |
|--------------------------------|----|----|--|--|
| Fiscal measures (eg. taxation) | No | No |  |  |
|--------------------------------|----|----|--|--|

## Notes

1 - Target behaviour change is promoted via exposure of potential subjects to a brief, but explicit, trilingual in-clinic educational video including compelling segments that are further simplified and delivered by seasoned experts. This video runs in loop and incorporates a touch of African finesse, art and lifestyle.

2 - A first of its kind public initiative to evaluate and address perceptions about stroke and genomics by patients, caregivers and local leaders; incorporating and promoting behavioural modification, medical regimen adherence programmes and community awareness of stroke and its risk factors.

3 - Engagement of a strong and sustained communication (person-person and mobile) strategy to potential subjects thus reinforcing the intervention's resolve to increase their self-efficacy to prevent the occurrence of a repeat stroke event.

4 - Involvement of community gatekeepers, advisory board committee, physicians and research team, in a person-person communication thus nurturing potential subject participation.

5 - Capacity building collaborations are fostered to increase research team's capability in adhering to standard operating practices necessary for the realisation of the study's objectives.

6 - There is strict adherence to stipulated guidelines and policies supporting conduct of clinical research as stated by the study protocol, ethics body and funding organisation.

7 - There is strict adherence to stipulated guidelines and policies supporting conduct of clinical research as stated by the study protocol, ethics body and funding organisation.

8 - Involvement of community gatekeepers in planning, scheduling, community participation, implementation and evaluation of health promotion and screening initiatives.

9 - Promotion of adoption of positive lifestyle behaviours by subjects via dissemination of correct and evidenced-based messages using the mHealth platform.
